# Supplementary material
Source: PubMed Central journal article supplement (PMC1757196)

A/New York/224/1998  
A/New York/313/1998  
A/New York/323/1999  
A/New York/240/1998  
A/New York/252/1999  
A/New York/328/1998  
A/New York/248/1999  
A/New York/311/1999  
A/New York/317/1999  
A/New York/457/1999  
A/New York/249/1998  
A/New York/253/1999  
A/New York/280/1999  
A/New York/320/1999  
A/New York/254/1998  
A/New York/451/1999  
A/New York/453/1999  
A/New York/255/1999  
A/New York/279/1999  
A/New York/256/1998  
A/New York/257/1999  
A/New York/259/1999  
A/New York/260/1999  
A/New York/340/1999  
A/New York/261/1999  
A/New York/262/1999  
A/New York/264/1999  
A/New York/266/1999  
A/New York/282/1999  
A/New York/284/1999  
A/New York/337/1999  
A/New York/285/1999  
A/New York/286/1999  
A/New York/288/1999  
A/New York/325/1999  
A/New York/290/1999  
A/New York/304/1998  
A/New York/318/1999  
A/New York/321/1999  
A/New York/322/1999  
A/New York/327/1999  
A/New York/329/1999  
A/New York/330/1998  
A/New York/454/1999  
A/New York/331/1999  
A/New York/332/1999  
A/New York/333/1999  
A/New York/338/1999  
A/New York/347/1999  
A/New York/398/1999  
A/New York/459/1999  
A/New York/397/1999  
A/New York/449/1999  
A/New York/450/1999  
A/New York/137/1999  
A/New York/138/1999  
A/New York/145/1999  
A/New York/146/1999

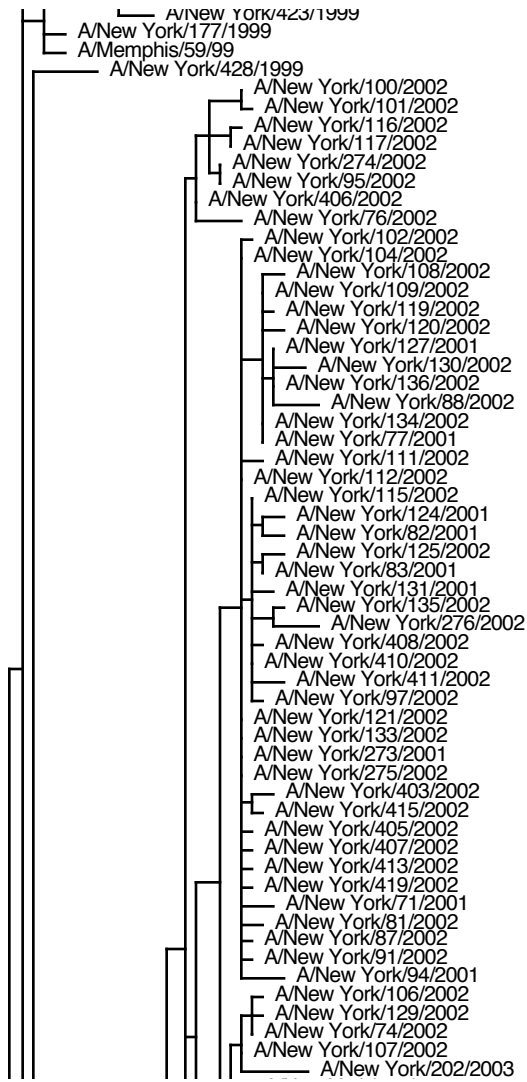

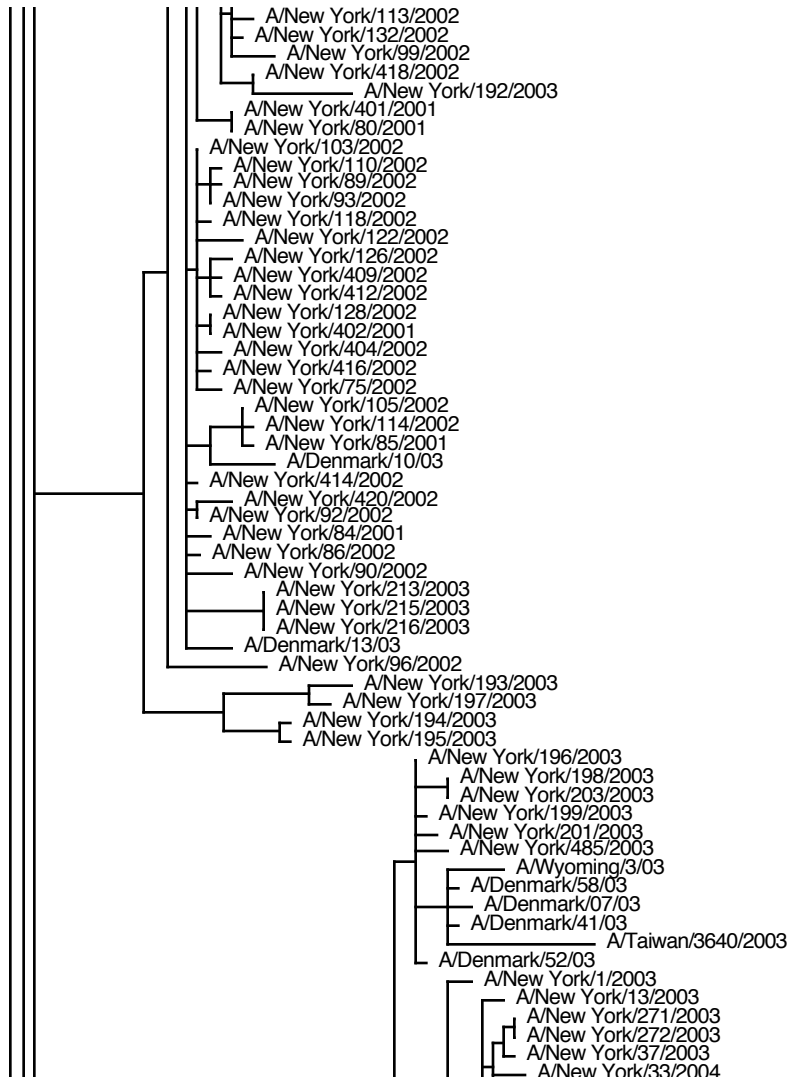

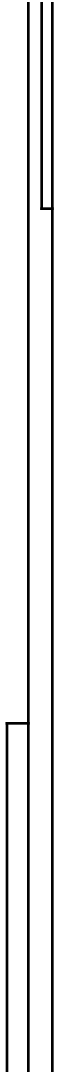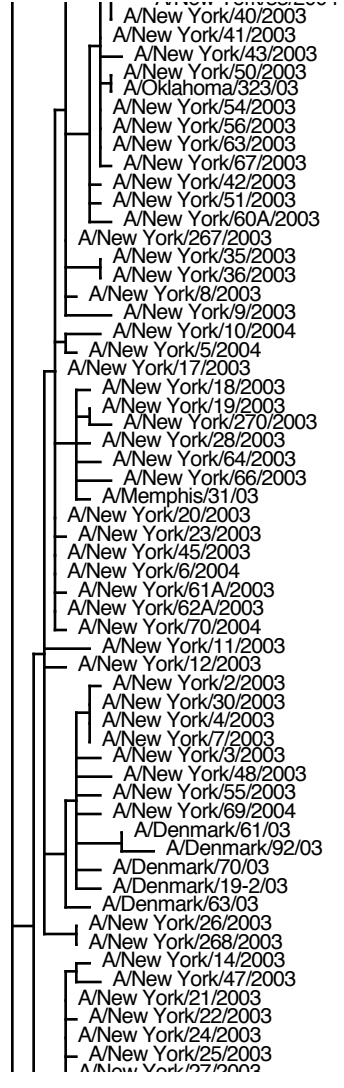

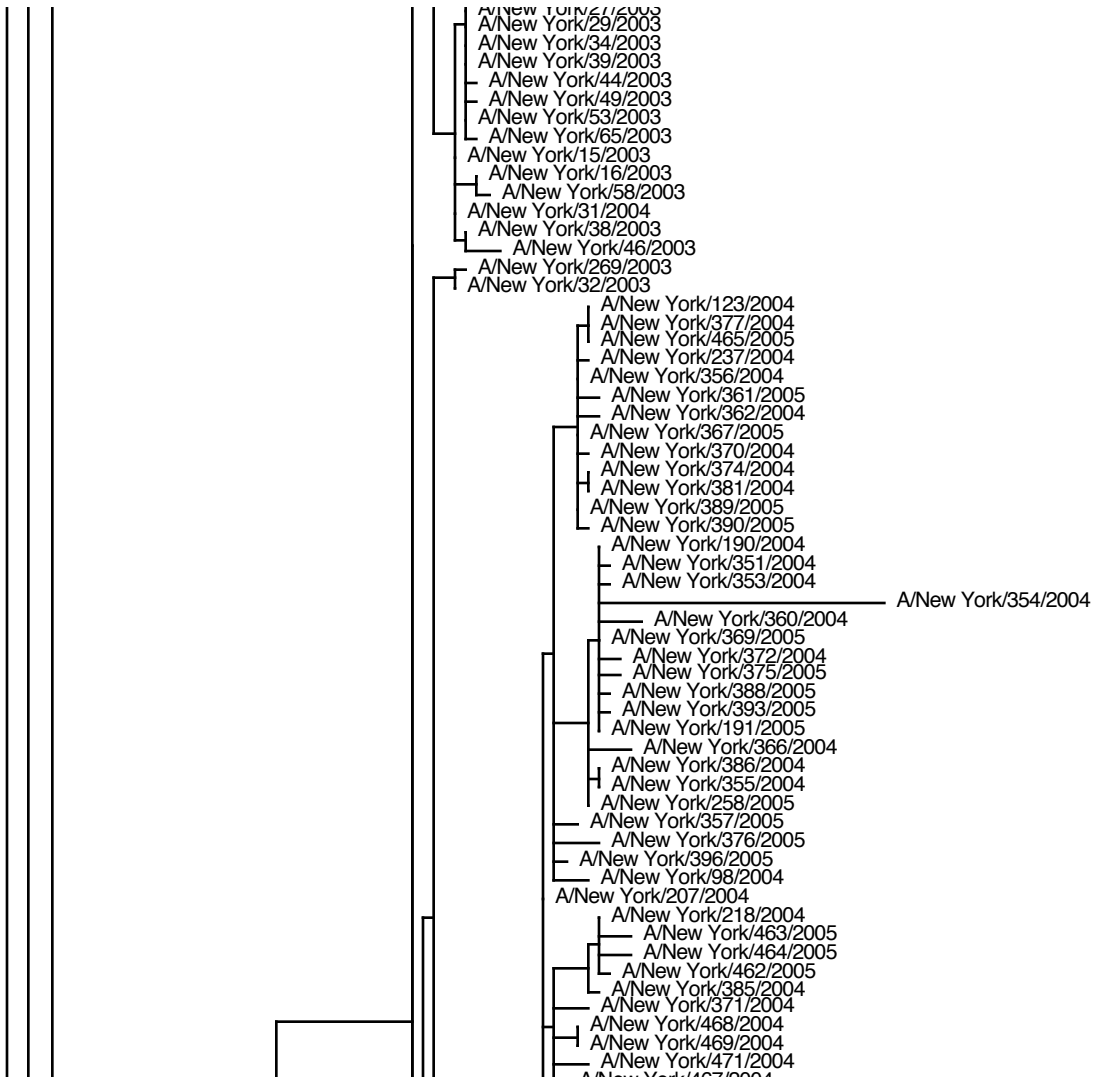

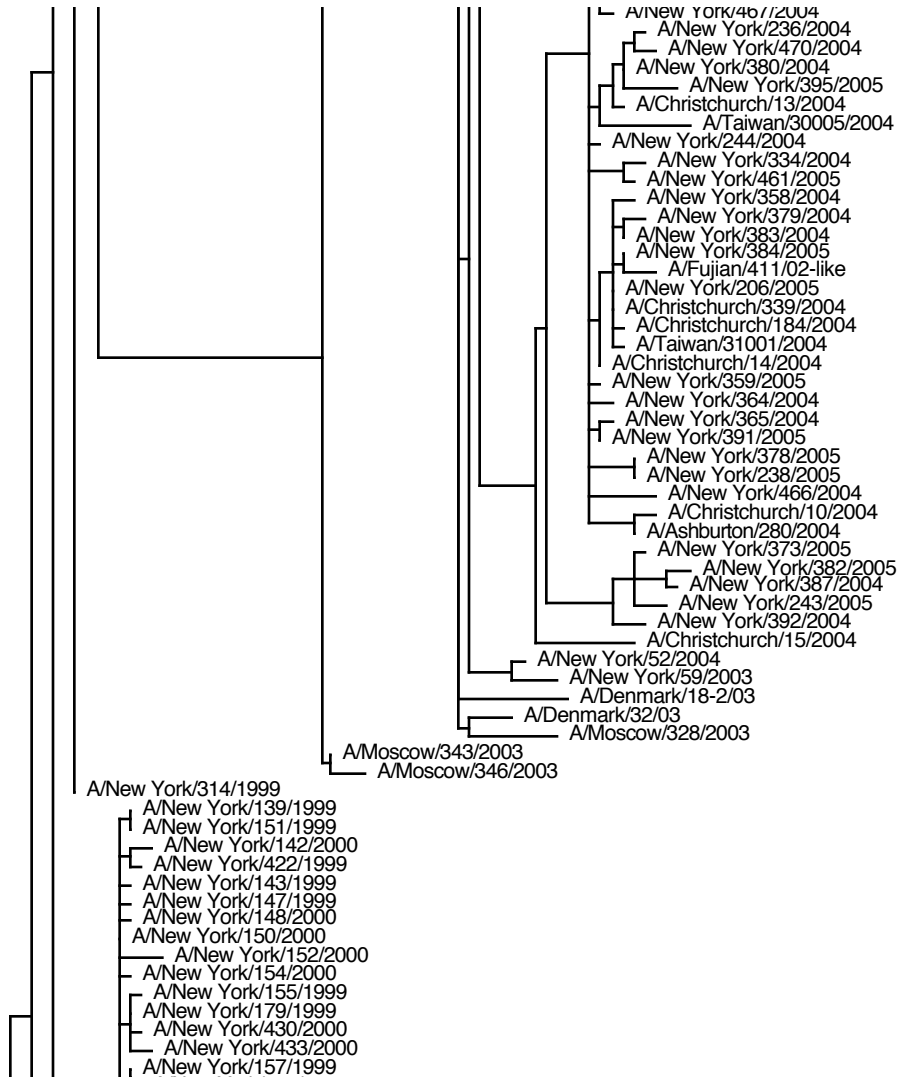

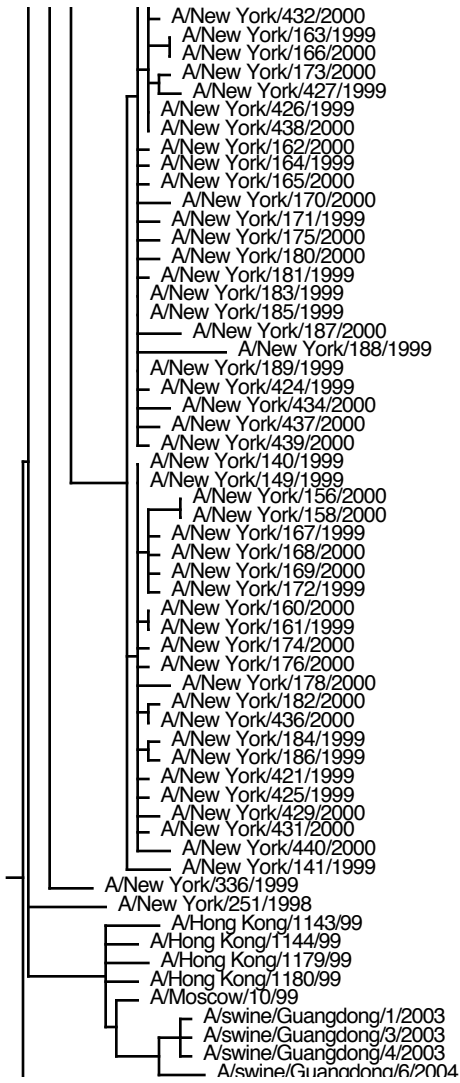

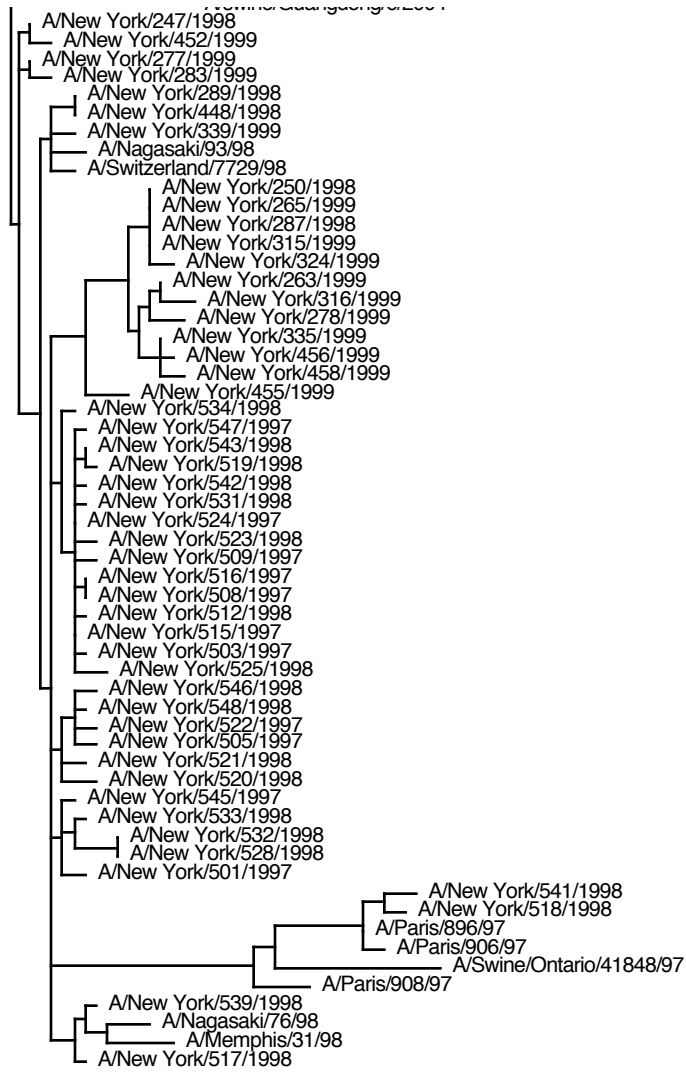

Supplement: ppat.0020125.sg003.pdf [file ppat.0020125.sg003.pdf]
