# Supplementary material
Source: PubMed Central journal article supplement (PMC1757196)

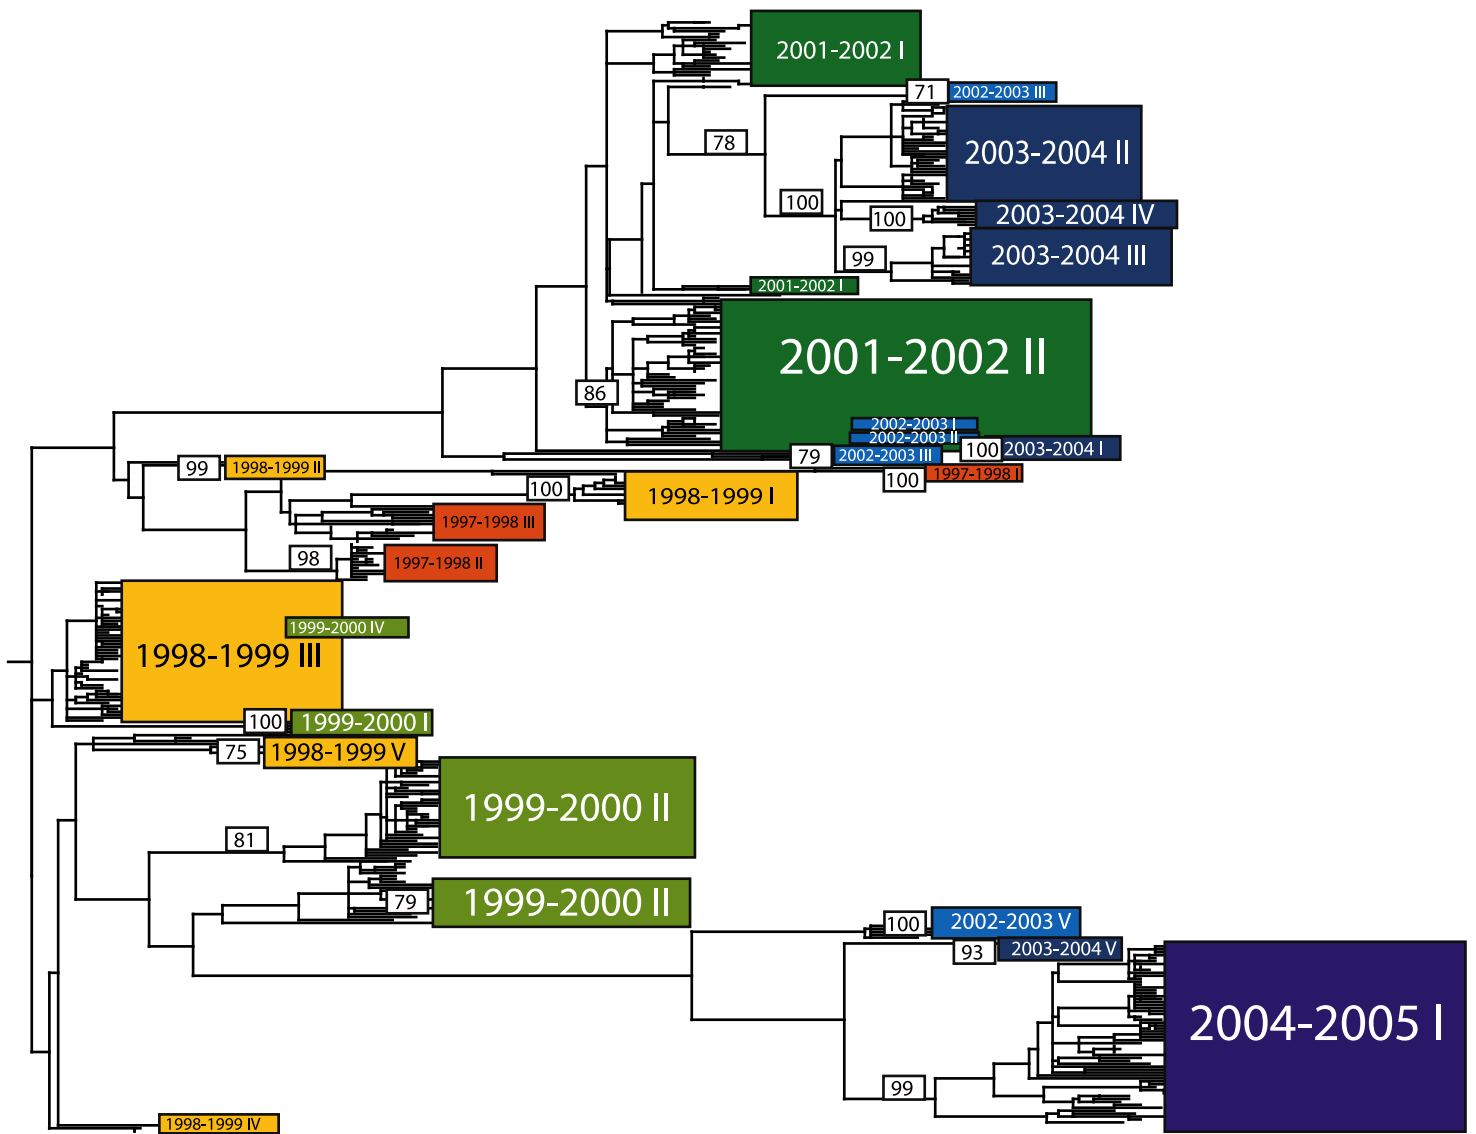

Supplement: ppat.0020125.sg001.pdf [file ppat.0020125.sg001.pdf]

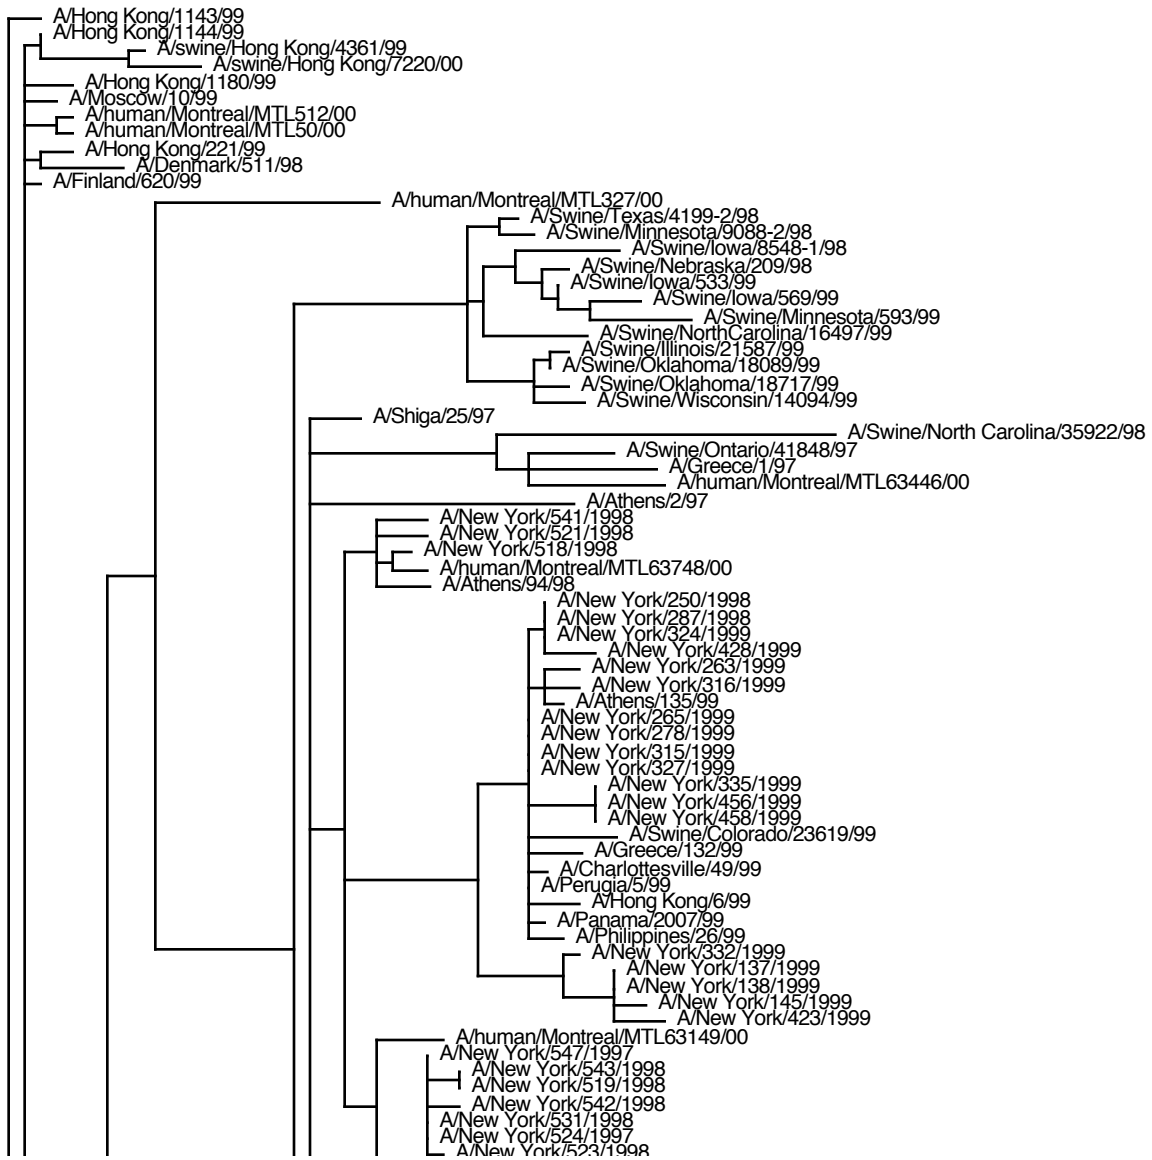

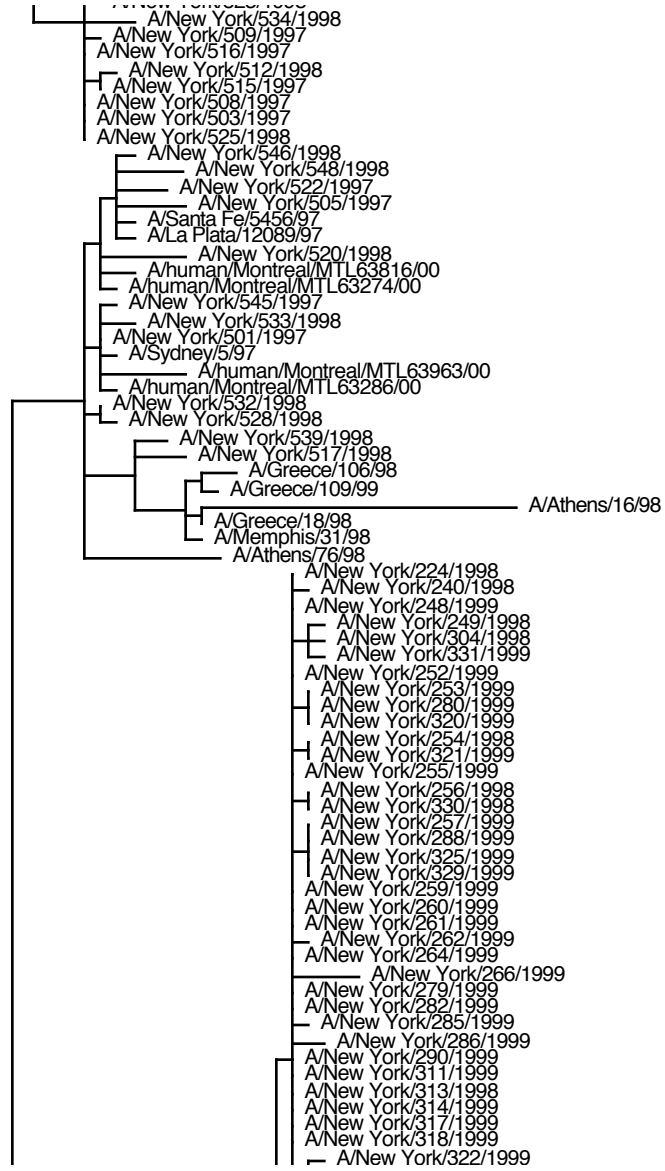

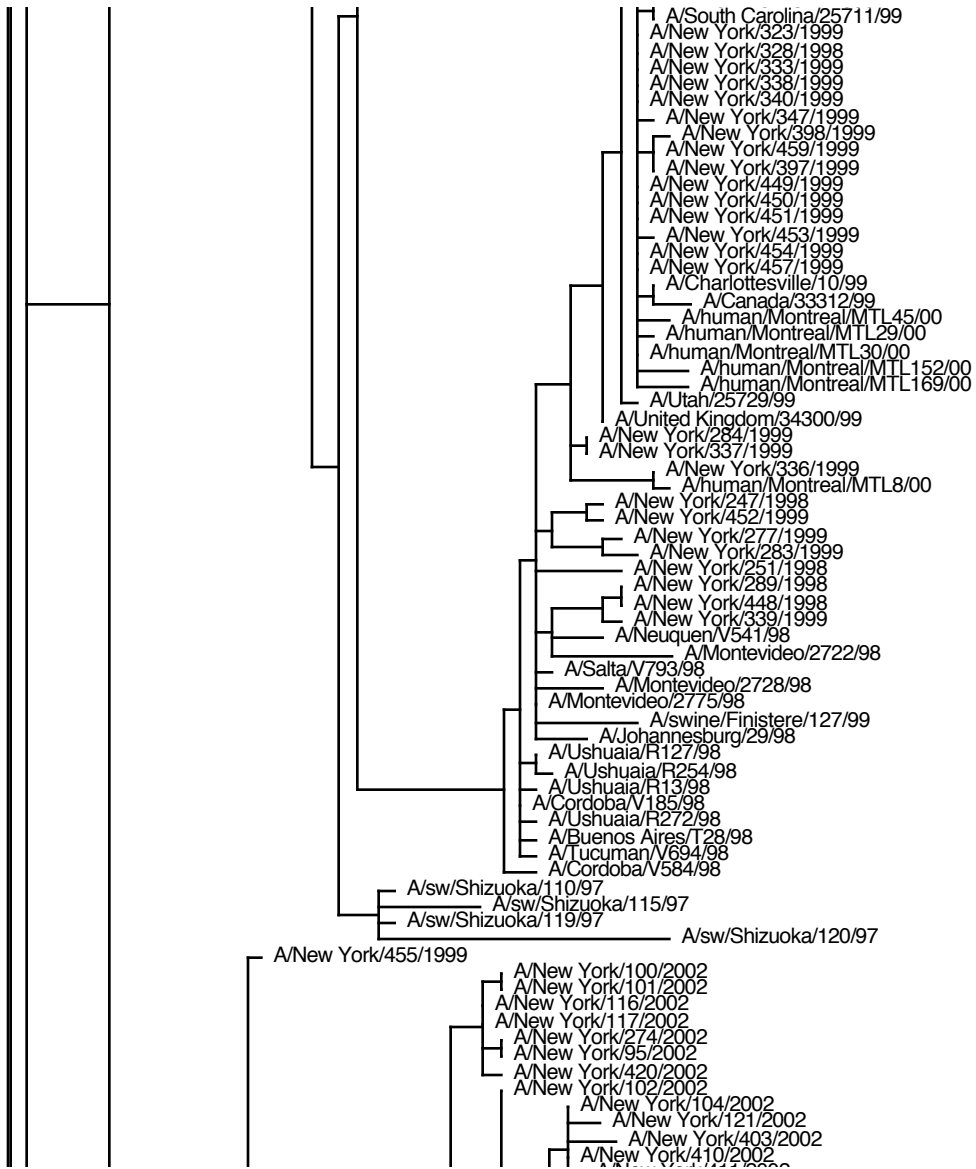

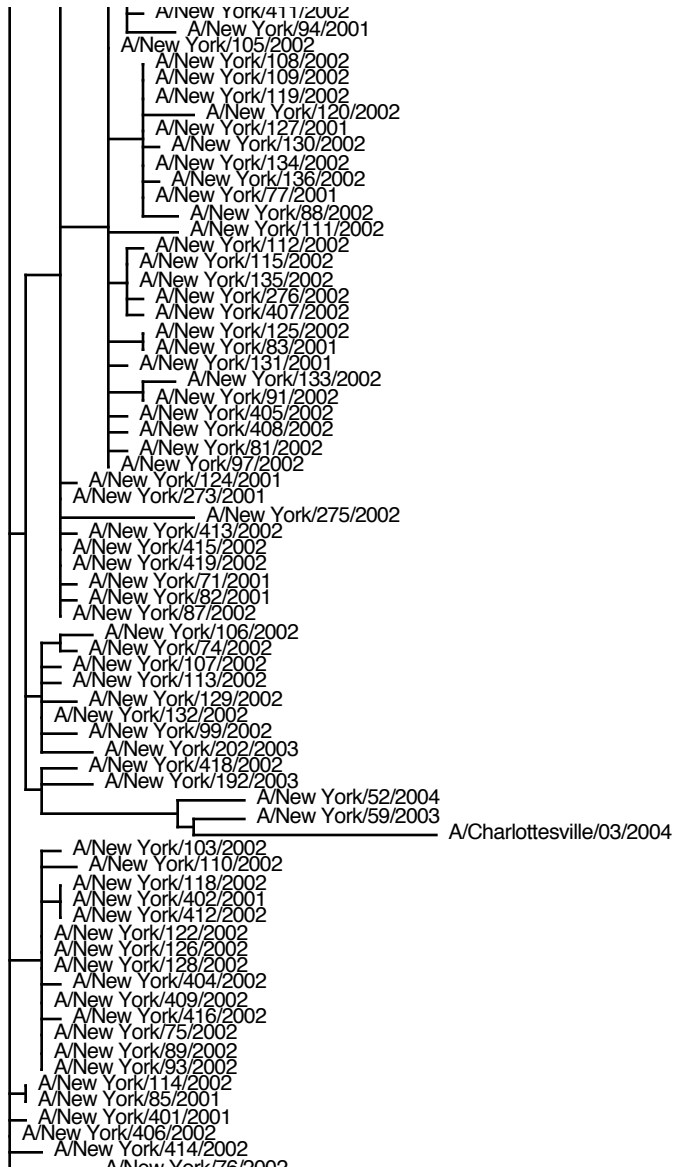

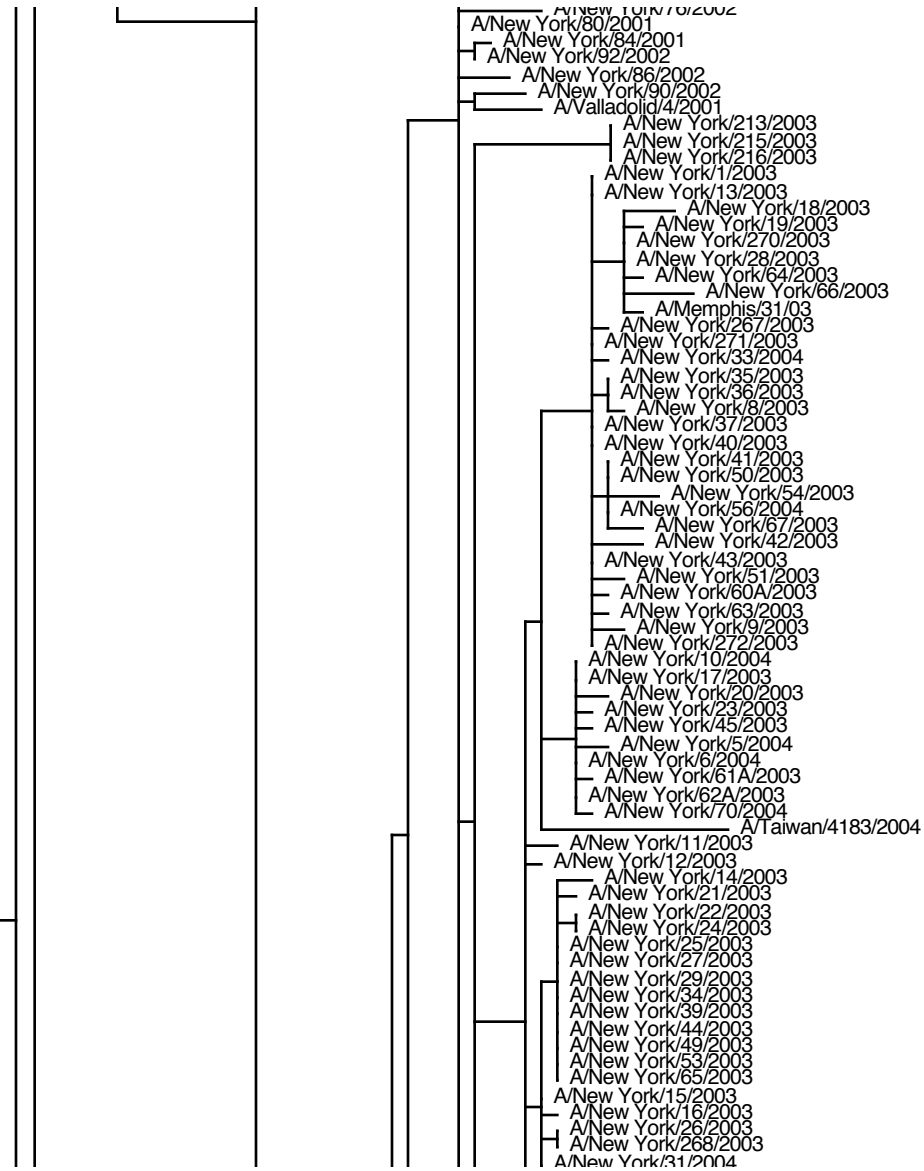

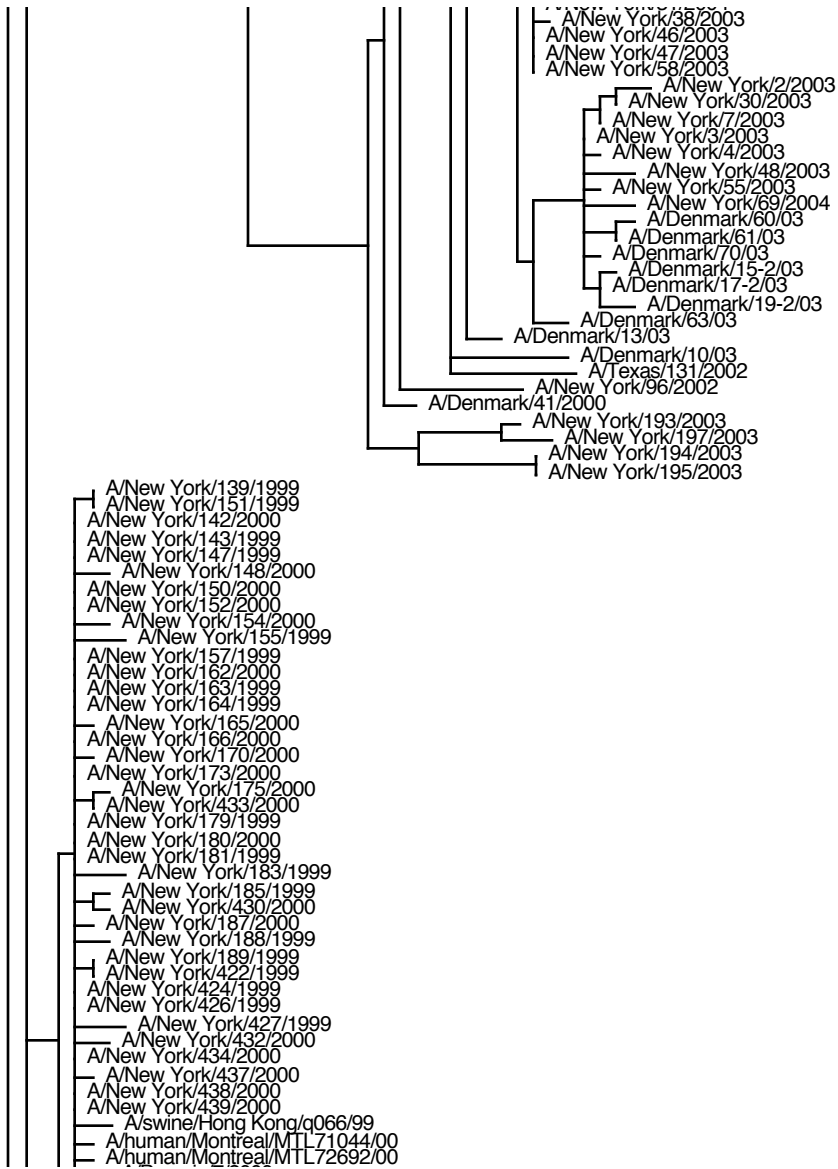

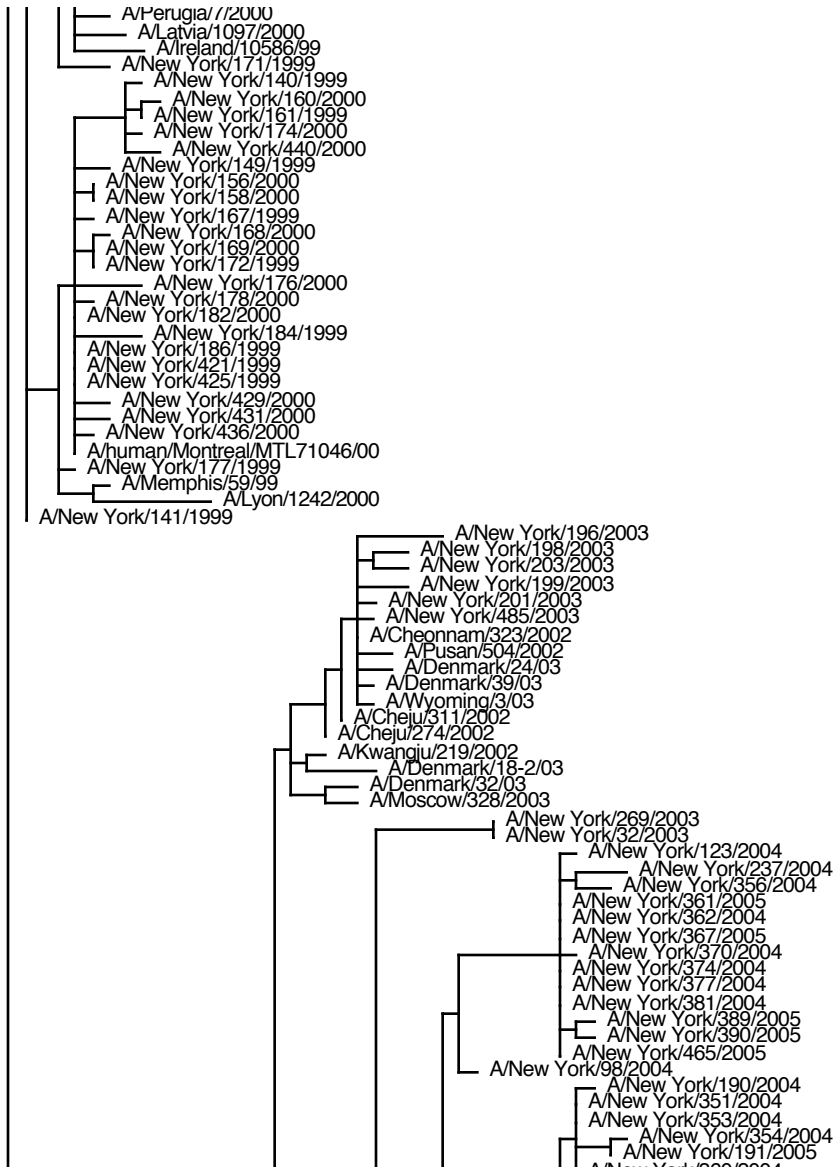

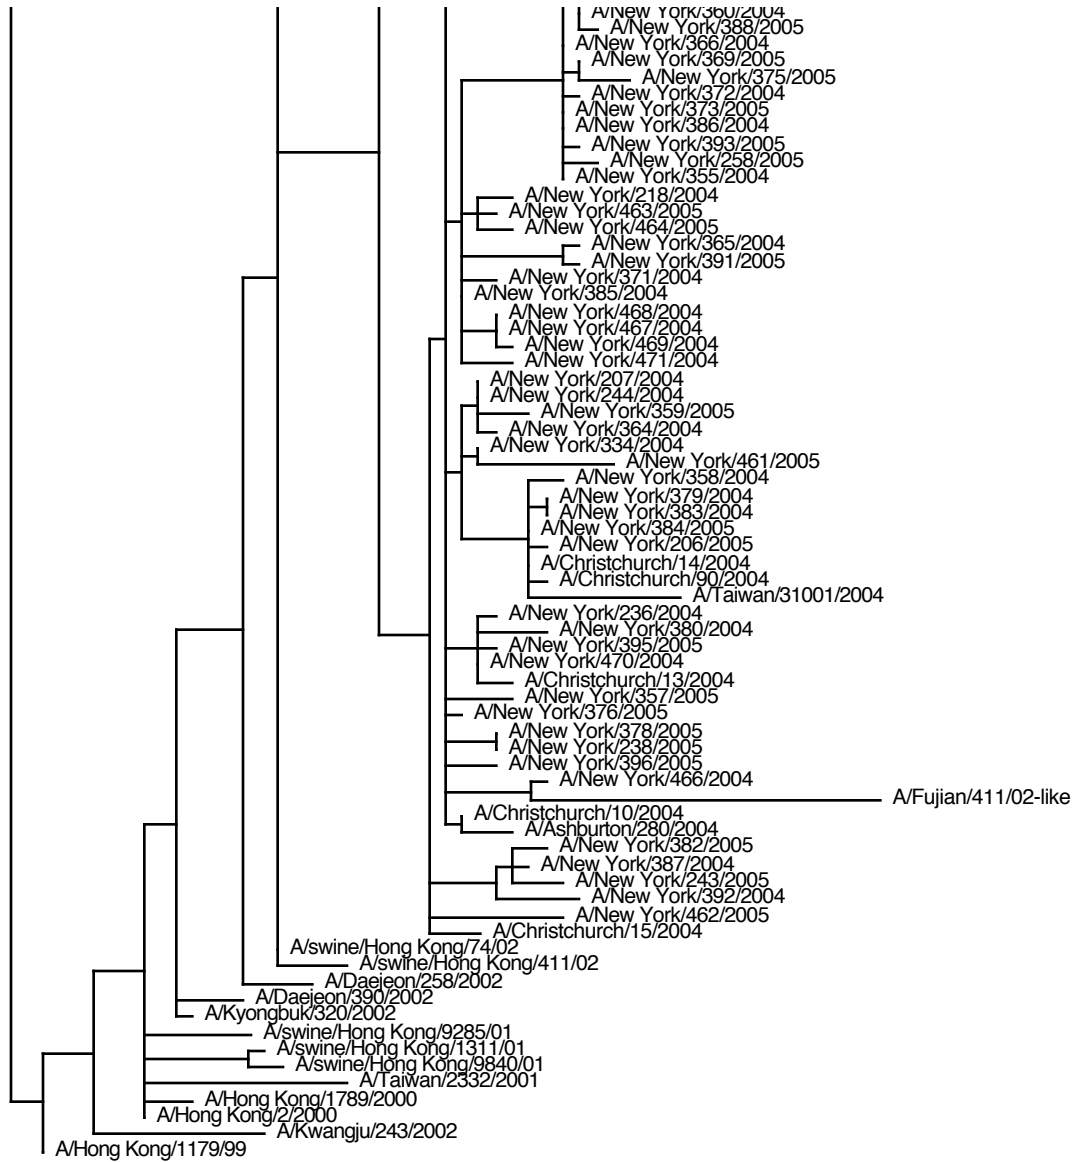

Supplement: ppat.0020125.sg002.pdf [file ppat.0020125.sg002.pdf]

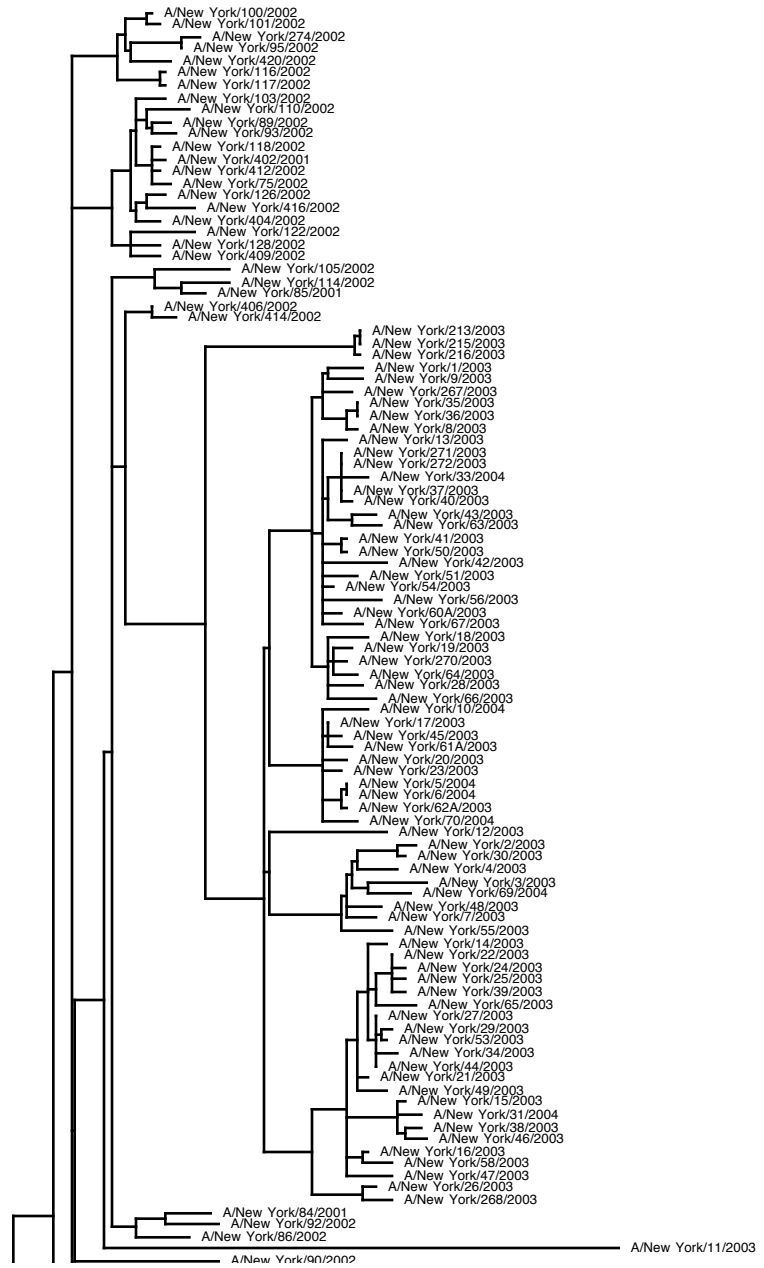

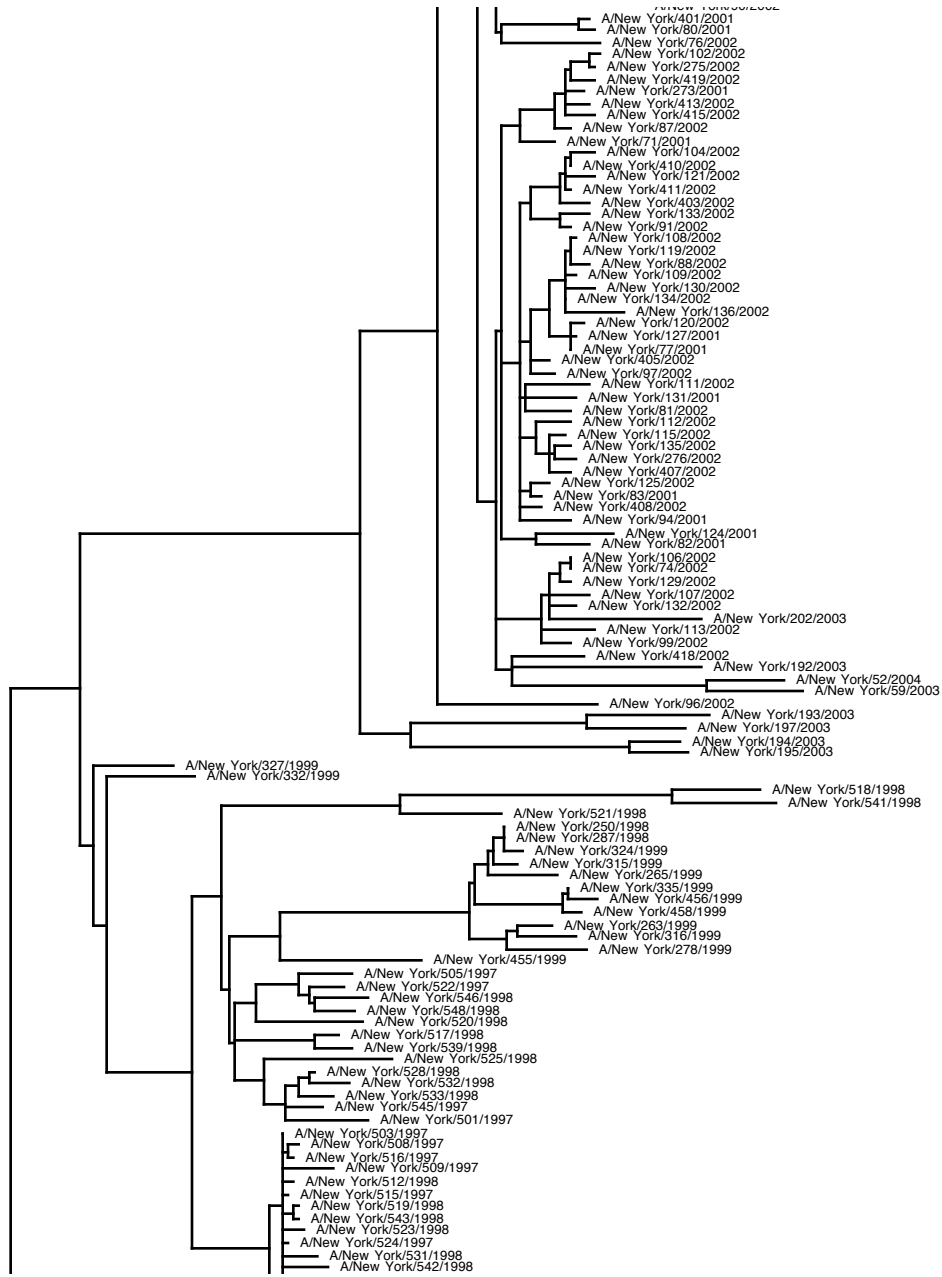

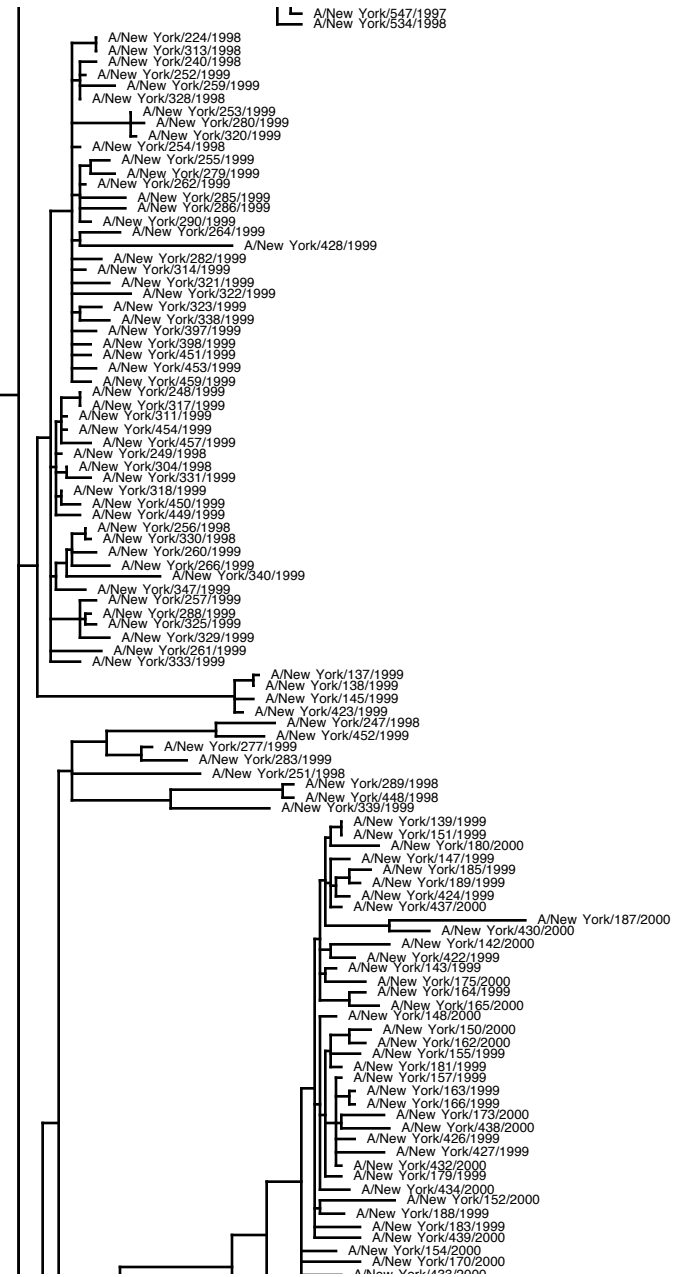

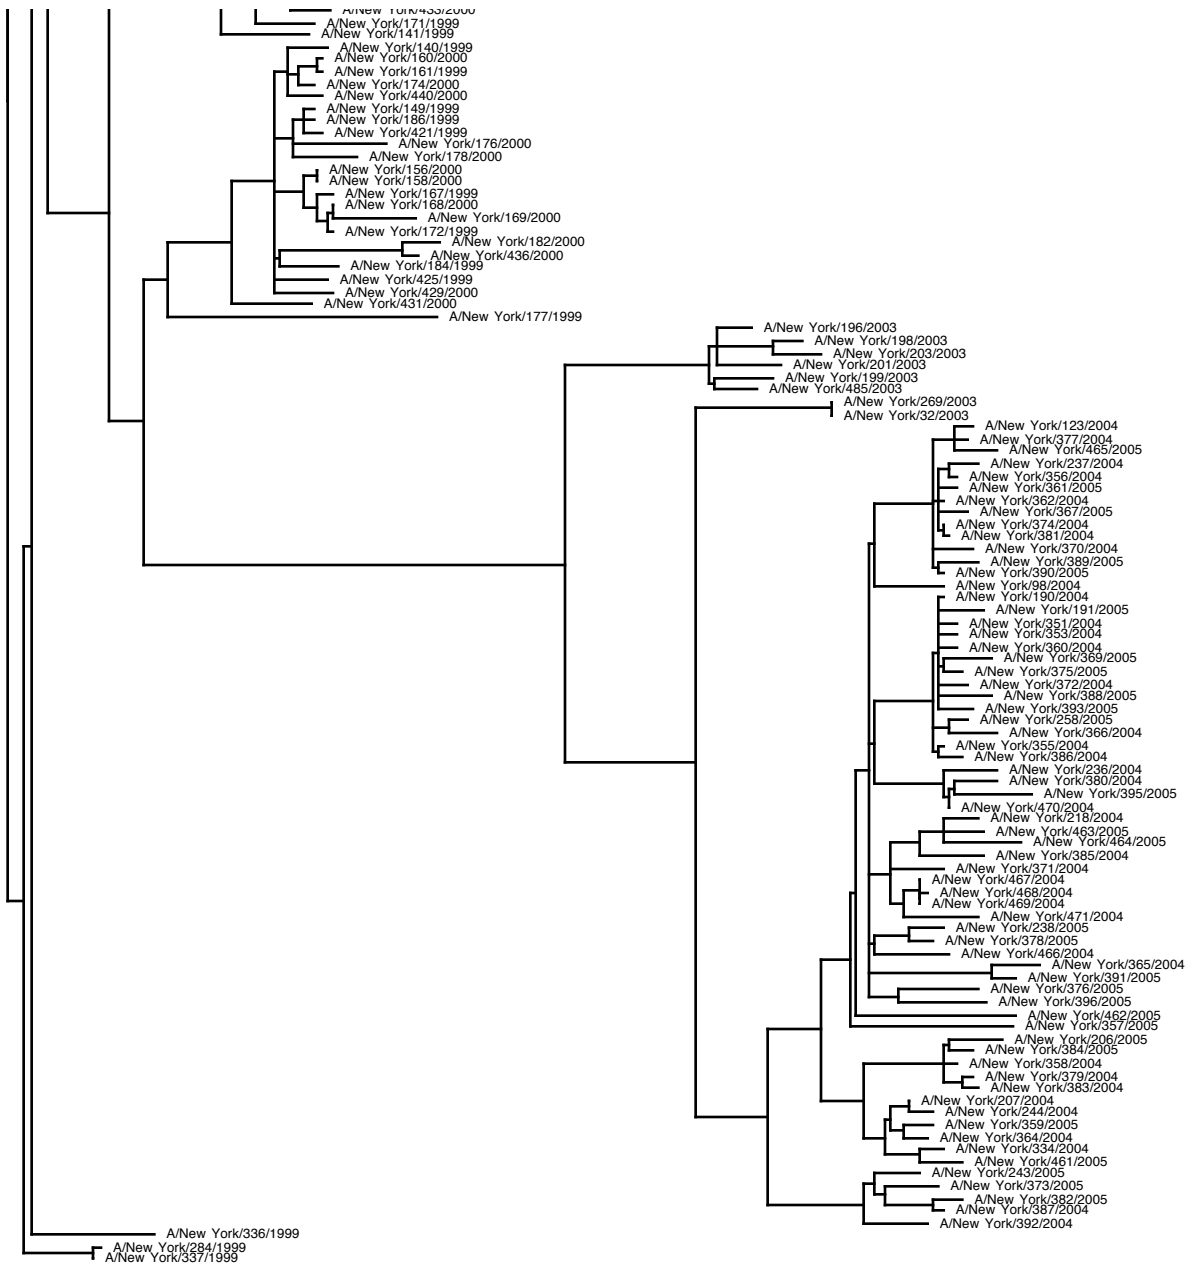

Supplement: ppat.0020125.sg004.pdf [file ppat.0020125.sg004.pdf]
